# Supplementary material
Source: Springer Nature journal article supplement (https://www.springermedizin.de/resource/supplementary/12875_2014_1066_MOESM1_ESM.pdf/9436074)
Supplement: MOESM1 [file 9436074]

| Component and definition                                                                                                                                                                                                                                       | Operationalisation                                                                                                                                                                                                                                                    | Measurements                |                        |                  |                    |                                    |                                          |                   |                      |              |
|----------------------------------------------------------------------------------------------------------------------------------------------------------------------------------------------------------------------------------------------------------------|-----------------------------------------------------------------------------------------------------------------------------------------------------------------------------------------------------------------------------------------------------------------------|-----------------------------|------------------------|------------------|--------------------|------------------------------------|------------------------------------------|-------------------|----------------------|--------------|
|                                                                                                                                                                                                                                                                |                                                                                                                                                                                                                                                                       | Dropout (call participants) | System log file Server | Helpdesk logbook | Inclusion list PNs | Evaluation sheets per consultation | (Demographic) Questionnaire participants | Questionnaire PNs | Interview PN (phone) | Focus gr PNs |
| <b>Recruitment</b><br>The recruitment procedures that were used.                                                                                                                                                                                               | Characteristics of participants that were invited and that refused to participate.                                                                                                                                                                                    |                             |                        |                  | x                  |                                    |                                          |                   |                      |              |
| <b>Reach</b><br>The proportion of the intended target population that participated in the intervention groups.                                                                                                                                                 | Characteristics of participants.                                                                                                                                                                                                                                      | x                           |                        |                  |                    | x                                  | x                                        |                   |                      |              |
|                                                                                                                                                                                                                                                                | Number of participants that completed the program or dropped out.                                                                                                                                                                                                     | x                           |                        |                  |                    |                                    |                                          |                   |                      |              |
|                                                                                                                                                                                                                                                                | Reasons for withdrawal.                                                                                                                                                                                                                                               | x                           |                        |                  |                    |                                    |                                          |                   |                      |              |
| <b>Context</b>                                                                                                                                                                                                                                                 | Characteristics of general practices.                                                                                                                                                                                                                                 |                             |                        |                  |                    |                                    |                                          |                   | x                    |              |
|                                                                                                                                                                                                                                                                | Characteristics of PNs.                                                                                                                                                                                                                                               |                             |                        |                  |                    |                                    |                                          |                   | x                    |              |
| <b>Fidelity</b><br>The extent to which each of the intervention components was delivered as planned <ul style="list-style-type: none"> <li>Extent to which the SSP was delivered as planned</li> <li>Extent to which the tool functioned as planned</li> </ul> | Planned preparation time and duration of the consultations.                                                                                                                                                                                                           |                             |                        |                  |                    | x                                  |                                          |                   |                      |              |
|                                                                                                                                                                                                                                                                | Extent to which technical problems occurred.                                                                                                                                                                                                                          |                             |                        | x                |                    |                                    | x                                        |                   |                      |              |
| <b>Dose delivered</b><br>The extent to which the intervention components were carried out as often and for as long as planned <ul style="list-style-type: none"> <li>Regarding the SSP</li> </ul>                                                              | Consultations and other contacts between participants and PNs (dates, time, planned and executed, within regular consultations or extra).                                                                                                                             |                             |                        |                  |                    | x                                  |                                          |                   |                      |              |
|                                                                                                                                                                                                                                                                | Extent to which the PN achieved to: <ul style="list-style-type: none"> <li>- Assess the physical activity level of the patient</li> <li>- Inform the participant about the risks of a sedentary lifestyle</li> <li>- Collaborative set goals and set up an</li> </ul> |                             |                        |                  |                    | x                                  | x                                        |                   |                      |              |

|                                                                                                                                                                                           |                                                                                                                                                                                                                                                                                         |  |   |   |   |   |   |   |   |   |
|-------------------------------------------------------------------------------------------------------------------------------------------------------------------------------------------|-----------------------------------------------------------------------------------------------------------------------------------------------------------------------------------------------------------------------------------------------------------------------------------------|--|---|---|---|---|---|---|---|---|
|                                                                                                                                                                                           | <ul style="list-style-type: none"> <li>action plan with the participant</li> <li>- Give feedback based on the physical activity goals</li> <li>- Discuss with the participant barriers and facilitators for being active</li> <li>- Use motivational interviewing techniques</li> </ul> |  |   |   |   |   |   |   |   |   |
| <ul style="list-style-type: none"> <li>Regarding the tool</li> </ul>                                                                                                                      | Tool: <ul style="list-style-type: none"> <li>- Functioning of the website as intended</li> <li>- Functioning of the app as intended</li> </ul>                                                                                                                                          |  | x | x |   |   |   |   |   |   |
|                                                                                                                                                                                           | Functioning of the monitor as intended                                                                                                                                                                                                                                                  |  |   | x |   |   |   |   |   |   |
| <b>Dose received (exposure)</b><br>Extent of participants' active engagement in and receptiveness to the intervention <ul style="list-style-type: none"> <li>Regarding the SSP</li> </ul> | Overall opinion of the participant and the PN regarding the participant's engagement in the program.                                                                                                                                                                                    |  |   |   |   | x | x |   | x |   |
| <ul style="list-style-type: none"> <li>Regarding the tool: extent to which the tool was used as intended</li> </ul>                                                                       | Instruction of the tool (use of the manual and the instruction movies)                                                                                                                                                                                                                  |  |   |   |   |   | x |   | x |   |
|                                                                                                                                                                                           | Adherence towards the tool (completion sessions)                                                                                                                                                                                                                                        |  | x |   |   |   |   |   |   |   |
|                                                                                                                                                                                           | Monitoring results in between consultations                                                                                                                                                                                                                                             |  |   |   |   |   |   | x | x |   |
| <b>Dose received (satisfaction)</b><br>Satisfaction of participants and PNs with the different components of the intervention                                                             | Experiences using the tool <ul style="list-style-type: none"> <li>- Activity monitoring</li> <li>- Sessions</li> <li>- Feedback messages</li> </ul>                                                                                                                                     |  | x |   |   |   | x |   | x |   |
|                                                                                                                                                                                           | Experience using the <i>It's LiFe!</i> monitor by PNs during the consultations. <ul style="list-style-type: none"> <li>- Set up and change goals</li> <li>- View participants' results</li> </ul>                                                                                       |  | x |   | x |   |   |   | x |   |
|                                                                                                                                                                                           | How satisfied were the participants and the PNs with the program, with the tool and with the combination of both?                                                                                                                                                                       |  |   |   |   |   | x | x | x | x |
|                                                                                                                                                                                           | How did the participants and the PNs perceive the outcomes and relevance of the intervention?                                                                                                                                                                                           |  |   |   |   |   | x | x | x | x |

**Additional file 2.** Components, operationalisation and measurements of the process evaluation
